# Supplementary material for: A trimeric CrRLK1L-LLG1 complex genetically modulates SUMM2-mediated autoimmunity
Source: PubMed Central journal article supplement (PMC7519094; doi:10.1038/s41467-020-18600-8), 2020-09-25
Supplement: 41467_2020_18600_MOESM1_ESM.pdf [file 41467_2020_18600_MOESM1_ESM.pdf]

## Supplementary information

### **A trimeric CrRLK1L-LLG1 complex genetically modulates SUMM2-mediated autoimmunity**

Yanyan Huang, Chuanchun Yin, Jun Liu, Baomin Feng, Dongdong Ge, Liang Kong, Fausto Andres Ortiz-Morea, Julia Richter, Marie-Theres Hauser, Wen-Ming Wang, Libo Shan, and Ping He

#### **Contents**

**Supplementary Figure 1.** Screen of *CrRLK1L* family members for *mekk1* suppressors.

**Supplementary Figure 2.** LETs do not regulate MPK4-mediated root development.

**Supplementary Figure 3.** LET2/MDS1 specifically promotes LET1 phosphorylation.

**Supplementary Figure 4.** The *llg1*, but not *lre*, *llg2*, nor *llg3* mutants suppress autoimmunity by silencing *MEKK1*.

**Supplementary Figure 5.** The *llg1* mutants regulate *mekk1* and *mpk4* cell death.

**Supplementary Figure 6.** Genotyping of *llg1-1mkk1/2* and *llg1-1mpk4* mutants.

**Supplementary Figure 7.** The *llg1-3* mutant suppresses the cell death triggered by MEKK2, not by SUMM2ac.

**Supplementary Table 1.** Primers used in this study.

**a**

| NO. T-DNA lines                   | AGI-Name                 | Predicted insertion site | Genotype | Cell death suppressor |
|-----------------------------------|--------------------------|--------------------------|----------|-----------------------|
| 1 <i>let2-1</i> (SALK_139579)     | AT5G38990- <i>MDS1</i>   | exon                     | HOMO     | Yes                   |
| 2 <i>let2-2</i> (SALK_066322)     | AT5G38990- <i>MDS1</i>   | exon                     | HOMO     | Yes                   |
| 3 <i>mds3-1</i> (SALK_074670C)    | AT5G39020- <i>MDS3</i>   | exon                     | HOMO     | No                    |
| 4 <i>mds4-1</i> (SALK_007613C)    | AT5G39030- <i>MDS4</i>   | exon                     | HOMO     | No                    |
| 5 <i>fer-4</i> (CS69044)          | AT3G51550- <i>FER</i>    | exon                     | HOMO     | No                    |
| 6 SALK_029056C                    | AT3G51550- <i>FER</i>    | exon                     | HOMO     | No                    |
| 7 <i>anx2-2</i> (SALK_133057C)    | AT5G28680- <i>ANX2</i>   | exon                     | HOMO     | No                    |
| 8 <i>anx1-1</i> (SALK_016179C)    | AT3G04690- <i>ANX1</i>   | exon                     | HOMO     | No                    |
| 9 <i>herk2</i> (SALK_105055C)     | AT1G30570- <i>HERK2</i>  | exon                     | HOMO     | No                    |
| 10 <i>cap1-1</i> (SALK_083442C)   | AT5G61350- <i>ERULUS</i> | exon                     | HOMO     | No                    |
| 11 <i>herk1-1</i> (SALK008043C)   | AT3G46290- <i>HERK1</i>  | Double mutant            | HOMO     | No                    |
| <i>the1-4</i> (CS829966)          | AT5G54380- <i>THE1</i>   | Double mutant            | HOMO     | No                    |
| 12 <i>curvy1</i> (SALK_018797C)   | AT2G39360- <i>CVY1</i>   | exon                     | HOMO     | No                    |
| 13 <i>anj-1</i> (SALK_114667C)    | AT5G59700- <i>ANJEA</i>  | exon                     | HOMO     | No                    |
| 14 <i>herk1-1</i> (SALK_008043C)  | AT3G46290- <i>HERK1</i>  | exon                     | HOMO     | No                    |
| 15 <i>mds2-1</i> (SALK_007108)    | AT5G39000- <i>MDS2</i>   | exon                     | HOMO     | No                    |
| 16 SAIL_907_G02                   | AT5G24010                | exon                     | WT       | No                    |
| 17 SAIL_809_D01                   | AT5G24010                | exon                     | WT       | No                    |
| 18 <i>bups1-T-1</i> (SALK_033062) | AT4G39110- <i>BUPS1</i>  | exon                     | WT       | No                    |
| 19 <i>bups1-T-3</i> (SAIL_33_C06) | AT4G39110- <i>BUPS1</i>  | exon                     | WT       | No                    |
| 20 <i>bups2</i> (SAIL_448_D02)    | AT2G21480- <i>BUPS2</i>  | exon                     | WT       | No                    |

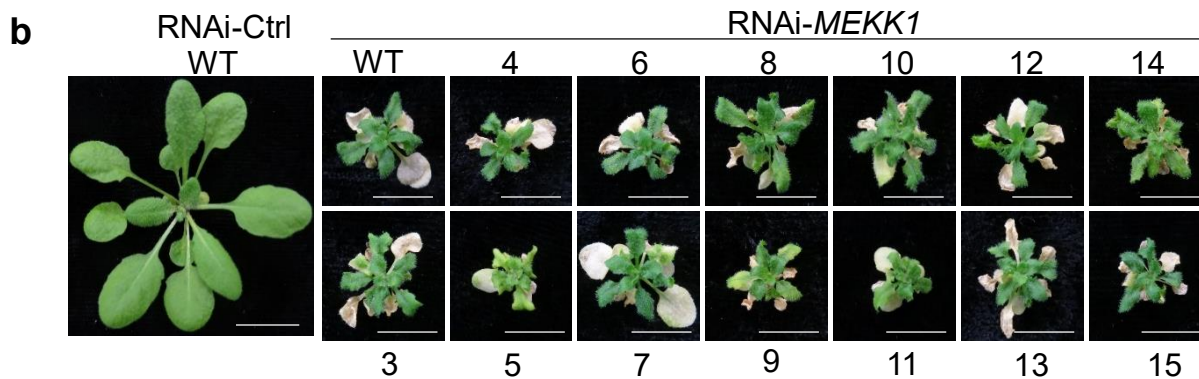

**Supplementary Figure 1. Screen of CrRLK1L family members for *mekk1* suppressors.**

**a.** The detailed information of T-DNA insertion lines of CrRLK1L family members in RNAi-*MEKK1* assays. HOMO indicates that the mutant is homozygous.

**b.** The phenotype induced by RNAi-*MEKK1*. The plant images were taken at three weeks after inoculation with Agrobacterium carrying RNAi-*MEKK1* vector. The number corresponds to the mutant marked with the same number in **(a)**. Scale bar, 1cm.

The above experiments were repeated twice with similar results.

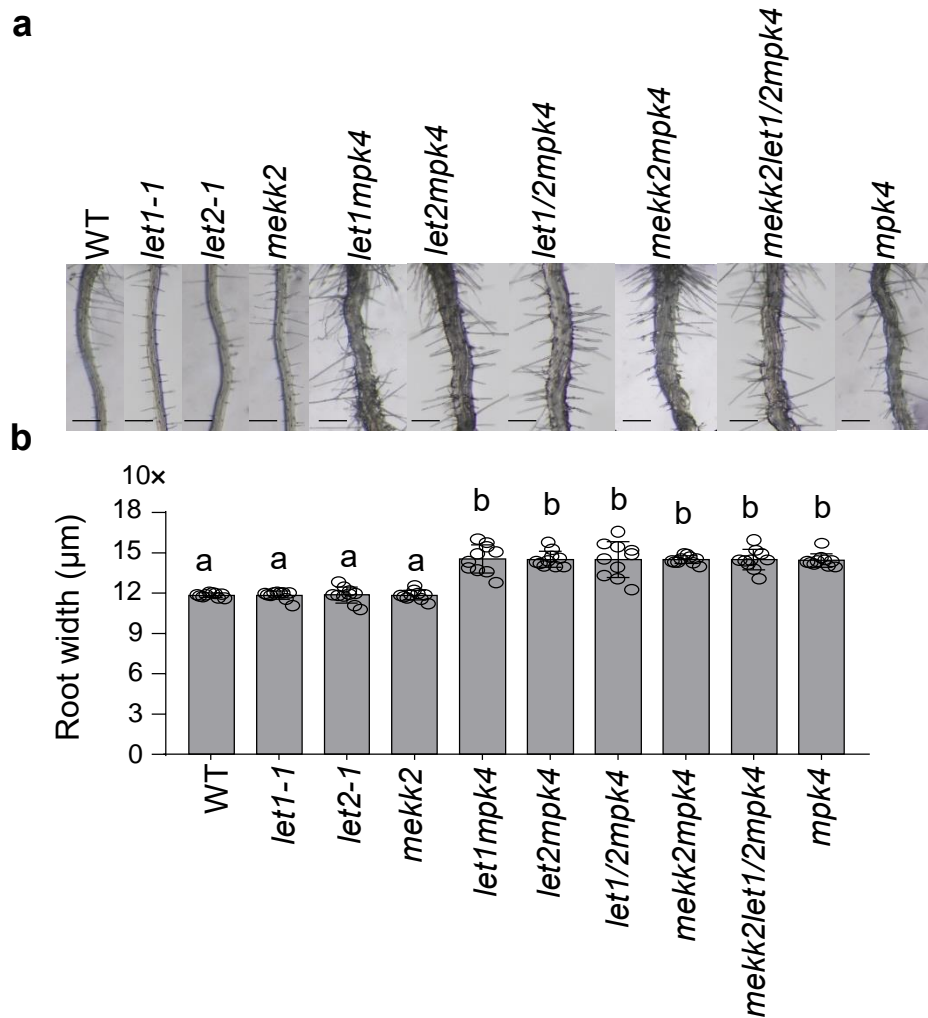

**Supplementary Figure 2. LETs do not regulate MPK4-mediated root development.**

**a.** The *let* mutants do not affect the root width in the *mpk4* mutant. The root images were taken at six days after germination on a ½MS plate under a stereoscopy. Scale bar, 200 µm.

**b.** Quantification of root width of plants in (a). The root width of the indicated lines was measured by image J. The data are shown as the mean ± SE ( $n=10$ ).  $P=4.4 \times 10^{-10}$  (column 1 and 5),  $P=4.42 \times 10^{-10}$  (column 1 and 6),  $P=4.48 \times 10^{-10}$  (column 1 and 7),  $P=4.50 \times 10^{-10}$  (column 1 and 8),  $P=4.50 \times 10^{-10}$  (column 1 and 9),  $P=4.67 \times 10^{-10}$  (column 1 and 10). The different letters indicate the significant difference determined by one-way ANOVA followed by the Tukey test ( $P < 0.05$ ).

The above experiments were repeated three times with similar results.

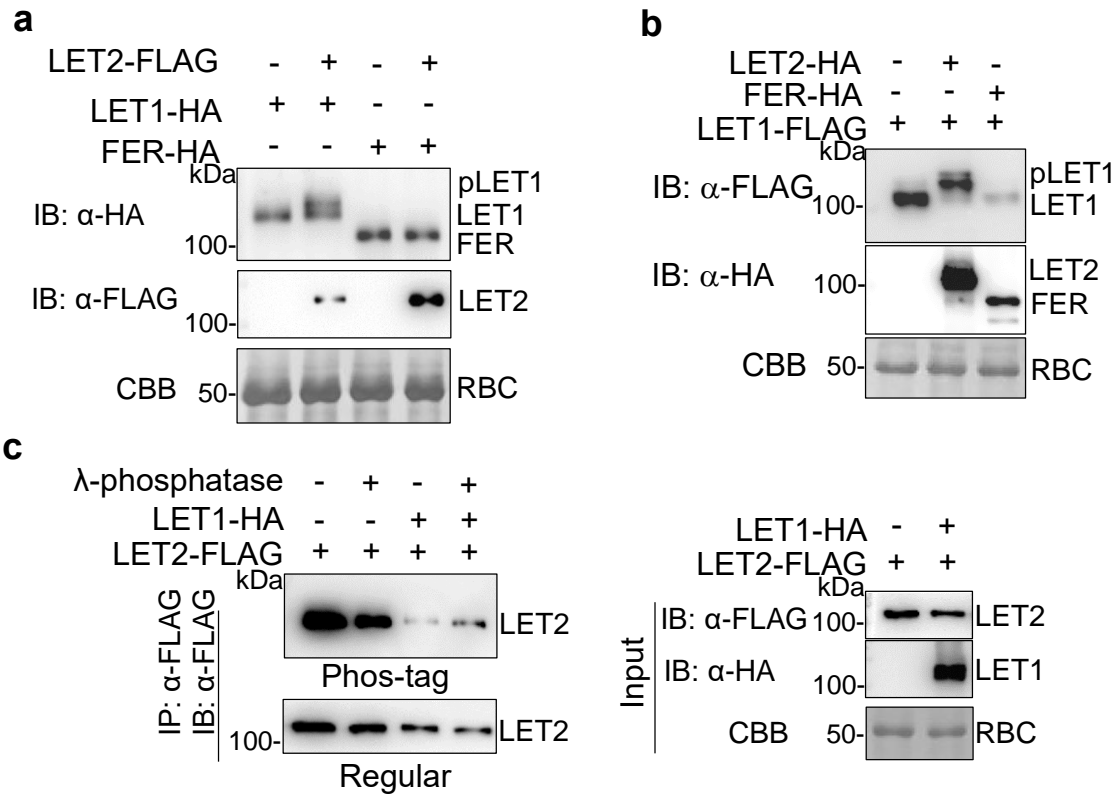

**Supplementary Figure 3. LET2/MDS1 specifically promotes LET1 phosphorylation.**

**a.** LET2/MDS1 promotes LET1, not FER, phosphorylation. LET1-HA or FER-HA was co-expressed with Ctrl or LET2-FLAG in protoplasts for 12 hr. The proteins were separated by 10% SDS-PAGE and detected by an  $\alpha$ -FLAG or  $\alpha$ -HA antibody. CBB staining of RBC was used as a loading control.

**b.** LET2/MDS1, not FER, promotes LET1 phosphorylation. LET2-HA or FER-HA was co-expressed with LET1-FLAG in protoplasts for 12 hr. The mobility-shift of LET1-FLAG was detected with a 7.5% SDS-PAGE. CBB staining of RBC was used as a loading control.

**c.** LET1 does not promote LET2/MDS1 phosphorylation. LET2-FLAG was co-expressed with Ctrl or LET1-HA in protoplasts. LET2-FLAG proteins were immunoprecipitated with  $\alpha$ -FLAG affinity beads, subsequently treated without or with 0.5  $\mu$ L (200 U) of  $\lambda$ -phosphatase for 1 hr. The proteins were separated by either Phos-tag SDS-PAGE (top left) or regular SDS-PAGE (bottom left). The proteins before immunoprecipitation were immunoblotted by an  $\alpha$ -HA or  $\alpha$ -FLAG antibody as inputs (right). CBB staining of RBC was used as a loading control.

The above experiments were repeated three times with similar results.

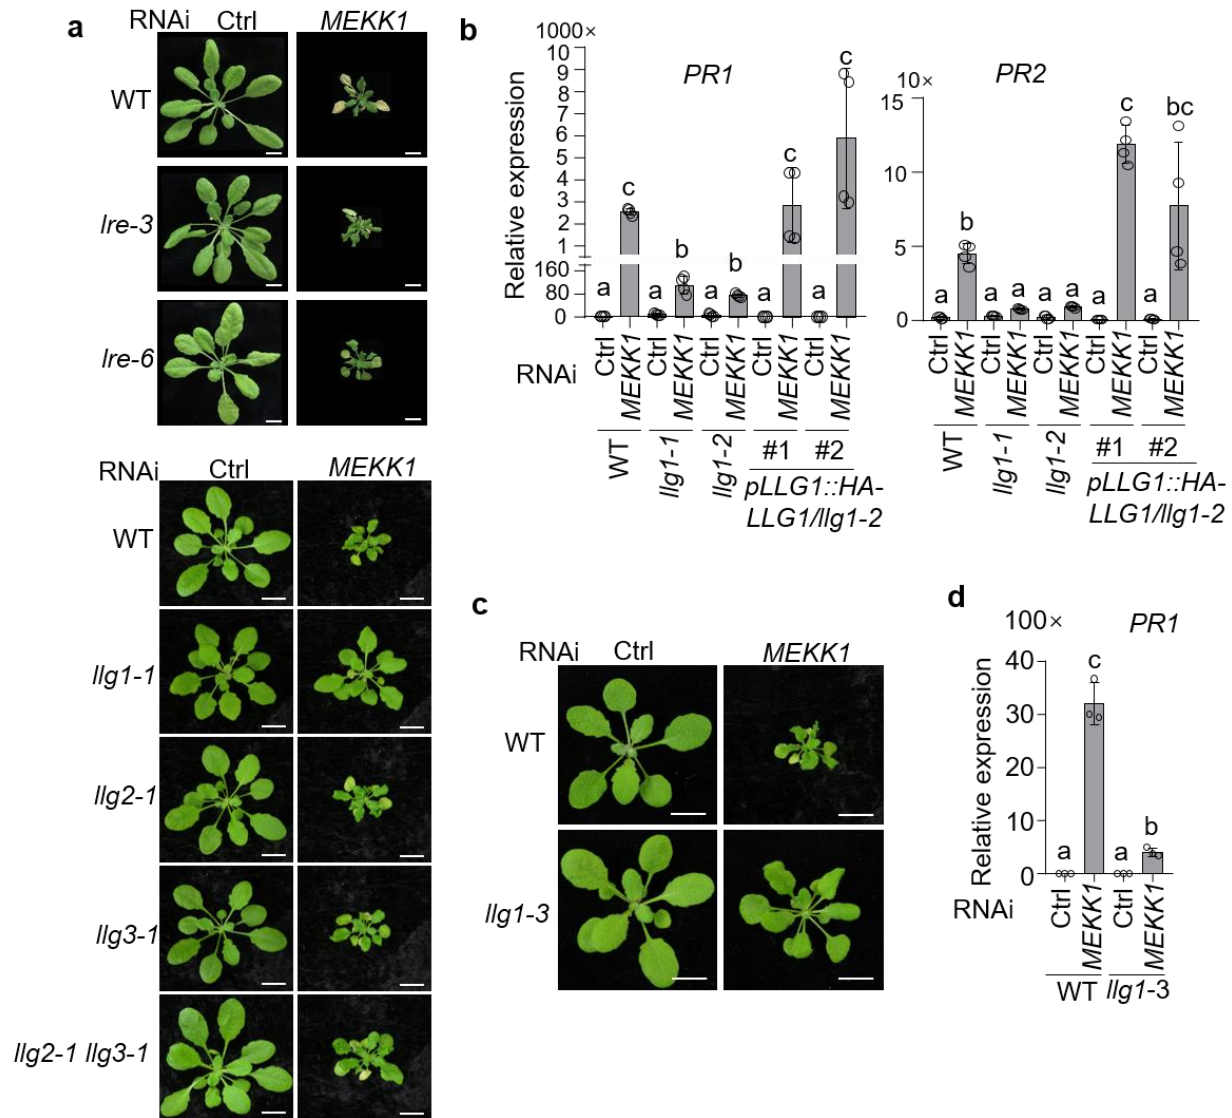

**Supplementary Figure 4. The *Ilg1*, but not *Ire*, *Ilg2*, nor *Ilg3* mutants suppress autoimmunity by silencing *MEKK1*.**

**a.** The *Ire*, *Ilg2*, *Ilg3* mutants do not suppress the cell death induced by silencing *MEKK1*. The images were taken at three weeks after inoculation of *Agrobacterium* carrying the indicated VIGS vector. Scale bar, 0.5 cm (top for *Ire* mutants), 1 cm (bottom for *Ilg2* and *Ilg3* mutants).

**b.** The *Ilg1* mutants suppress the expression of *PR* genes induced by silencing *MEKK1*. The expression of *PR1* (left) and *PR2* (right) was normalized to the expression of *UBQ10* and the data are shown as the means  $\pm$  SE of four biological repeats ( $n=4$ ).  $P=1.20 \times 10^{-2}$  (*PR1*, column 2 and 4),  $P=0.99 \times 10^{-2}$  (*PR1*, column 2 and 6),  $P=2.83 \times 10^{-2}$  (*PR2*, column 2 and 4),  $P=4.03 \times 10^{-2}$  (*PR2*, column 2 and 6). The different letters indicate the significant difference determined by one-way ANOVA followed by the Tukey test ( $P < 0.05$ ).

**c.** The *Ilg1-3* mutant partially suppresses the cell death induced by silencing *MEKK1*. The assay was done as in (a). Scale bar, 1 cm.

**d.** The expression of *PR1* induced by silencing *MEKK1* is suppressed in *Ilg1-3*. The expression of *PR1* was normalized to the expression of *UBQ10* and the data are shown

as the means  $\pm$  SE of three biological repeats ( $n=3$ ).  $P=8.23 \times 10^{-7}$  (column 2 and 4). The different letters indicate the significant difference determined by one-way ANOVA followed by the Tukey test ( $P < 0.05$ ).

The above experiments were repeated three times with similar results.

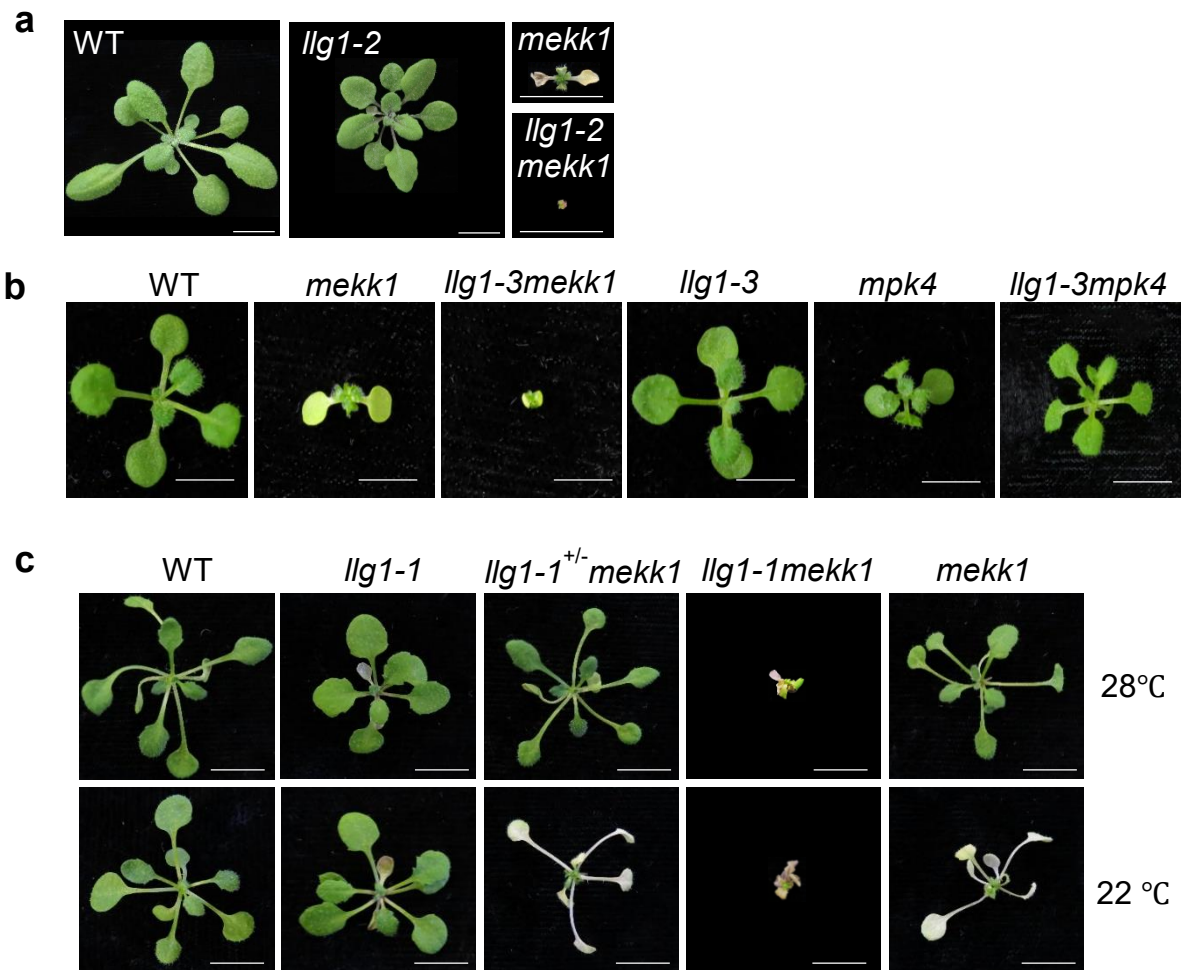

**Supplementary Figure 5. The *Ilg1* mutants regulate *mekk1* and *mpk4* cell death.**

**a.** The *Ilg1-2* mutant enhances the growth defects of *mekk1*. The images were photographed at three weeks after germination with plants grown on soil. Scale bar, 1cm.

**b.** The *Ilg1-3* mutant enhances *mekk1*, but suppresses *mpk4* growth defects. Plants grown on ½MS plates were photographed at two weeks after germination. Scale bar, 1cm.

**c.** The growth defects of *Ilg1-1mekk1* mutant do not recover at 28°C. The indicated plants were first grown in a growth room at 22°C for 3 days after germination and then moved to a 28°C growth room for three weeks (upper panel). Finally, the plants were moved back to a 22°C growth room for another three days (low panel). Scale bar, 1cm.

The above experiments were repeated three times with similar results.

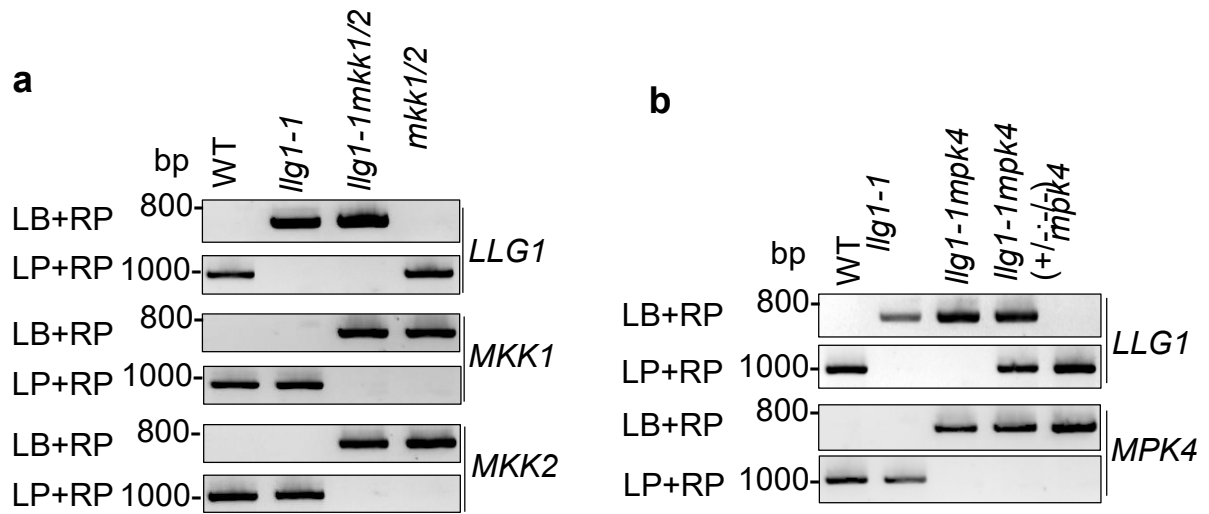

**Supplementary Figure 6. Genotyping of *Ilg1-1mkk1/2* and *Ilg1-1mpk4* mutants.**

WT, *Ilg1-1*, *mkk1/2* and *mpk4* were used for control for genotyping of *Ilg1-1mkk1/2* (a) and *Ilg1-1mpk4* (b) mutants. The primers used for genotyping are listed in Supplementary Table 1. The primer pair of LP and RP amplified genomic DNA, and the primer pair of LB and RP amplified T-DNA insertion.

The above experiments were repeated twice with similar results.



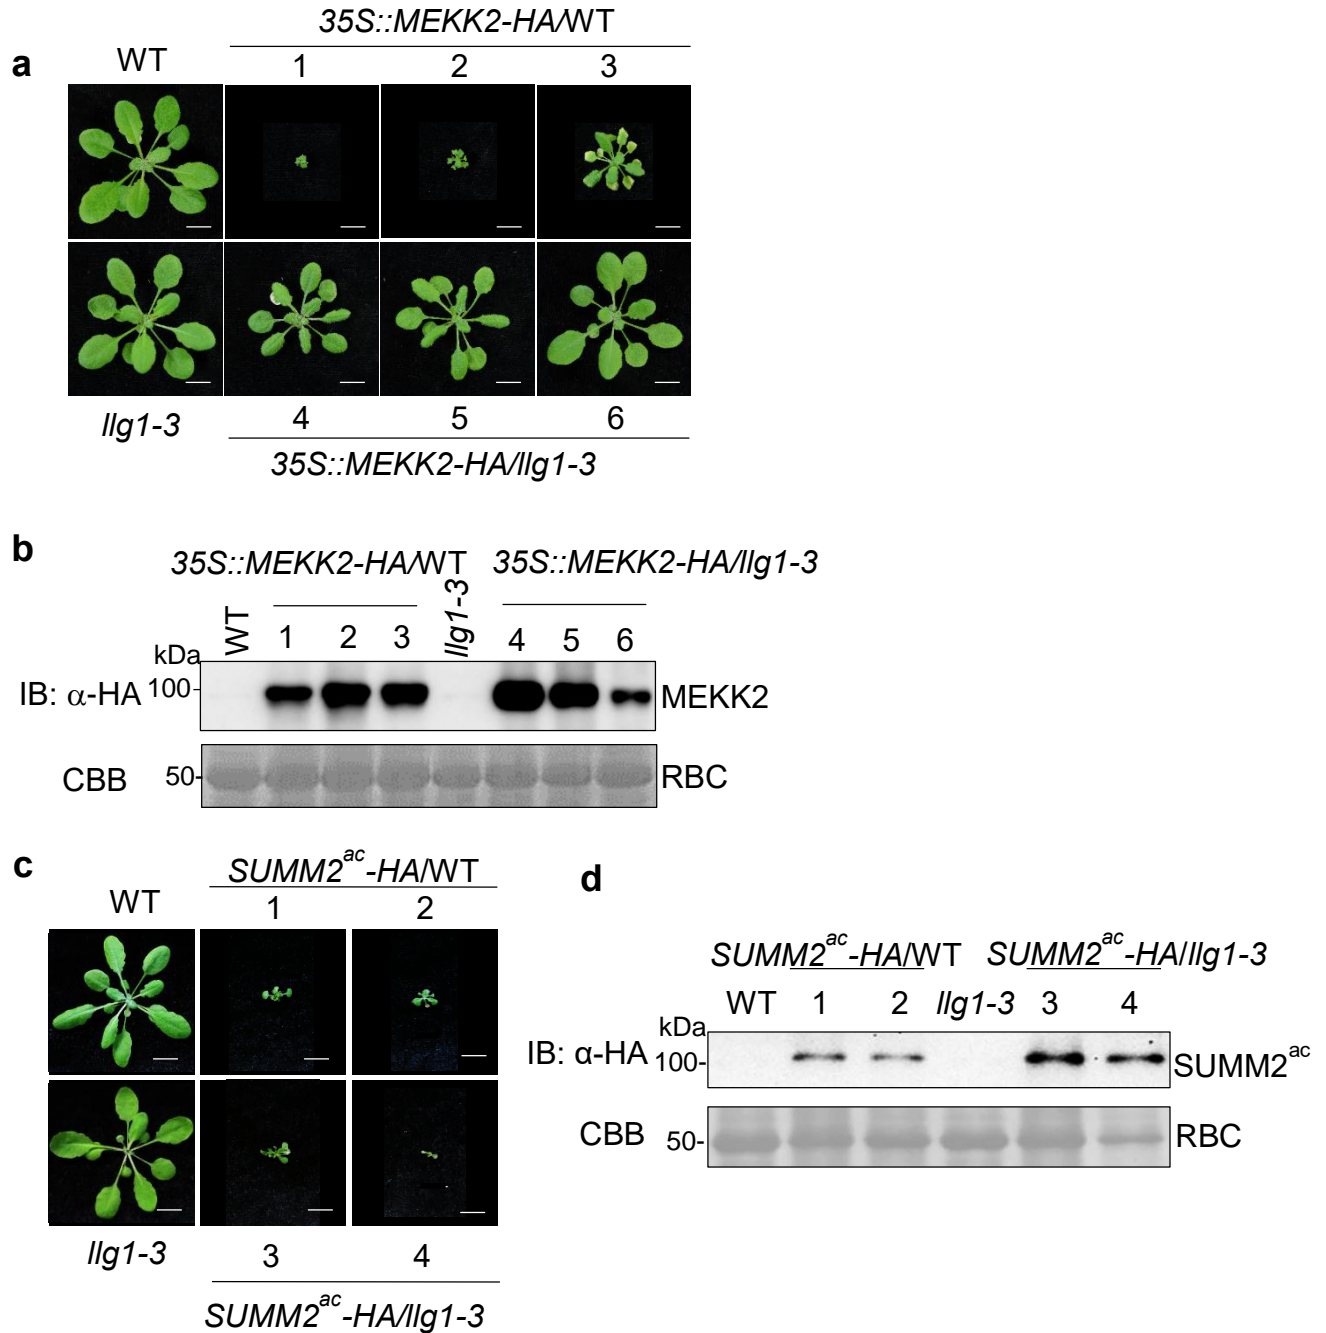

**Supplementary Figure 7. The *llg1-3* mutant suppresses the cell death triggered by MEKK2, not by SUMM2<sup>ac</sup>.**

**a.** The *llg1-3* mutant largely suppresses the cell death triggered by overexpressing MEKK2. The images were photographed for T<sub>1</sub> generation of transgenic lines overexpressing MEKK2-HA in WT and *llg1-3* at four weeks after germination. Scale bar, 1cm.

**b.** The protein accumulation in transgenic lines overexpressing MEKK2-HA. Total proteins were isolated from plants in (a) and immunoblotted using an α-HA antibody (top panel). CBB staining of RBC is shown as the loading control (bottom panel).

**c.** The growth defects triggered by overexpressing *SUMM2<sup>ac</sup>-HA* are similar in WT and *llg1-3*. Two representative plants in each background were photographed at four weeks after germination. Scale bar, 1 cm.

**d.** Protein expression of *SUMM2<sup>ac</sup>-HA* in transgenic plants in **(c)**. The assay was performed as in **(b)**.

The above experiments were repeated twice with similar results.

**Supplementary Table 1. Primers used in this study**

**Genotyping primers**

| Name            | Sequence               |
|-----------------|------------------------|
| SALK_127359 -LP | TGAGTCAAGGCTTGACATGTG  |
| SALK_127359-RP  | TTAAGCAATGGATGGTCGAG   |
| SALK_045687-LP  | AAACGAATTAATCCCGGTTTG  |
| SALK_045687-RP  | CAAGGACTCAACGAATTCGAG  |
| SALK_007613-LP  | GACTTGCATCCTCTGGTGAAG  |
| SALK_007613-RP  | TCCTTCCATCATTTCAACGAC  |
| SALK_029056-LP  | TGGTAGGATTCCGTTAAAATGC |
| SALK_029056-RP  | CAGAGTATTTCAAGACGGCAGC |
| SALK_018797-LP  | TTGGTGGTGCATTAGGAAAAG  |
| SALK_018797-RP  | ACAACAAATCTCCATTGCTG   |
| SALK_074670-LP  | GCAACATCATAAAGAACAACCC |
| SALK_074670-RP  | TAGCATACACATCATACGGCG  |
| SALK_105055-LP  | ACTGGTCACAATGCTACTGCC  |
| SALK_105055-RP  | CTTACCAAACCTCCAACCTCC  |
| SALK_008043-LP  | ATGTGACTTGGGAGTTCGATG  |
| SALK_008043-RP  | TGCAGATTTACGTCTCTGTG   |
| SALK_083442-LP  | TTTATCAACGCCGTTGAAATC  |
| SALK_083442-RP  | ATTTTGTGTGCGGGTCTGTAG  |
| SALK_114667-RP  | GCACCACTCAAAGTGTGGA    |
| SALK_114667-LP  | TGGATCATCAACCAACGTCA   |
| SAIL_907_G02-LP | ACCTGGCTCGAGTTTTCTCTC  |
| SAIL_907_G02-RP | AACACAAAACCTCCCAAACCC  |
| SALK_033062-LP  | CTGAGCTCCAAGTCCAGATTG  |
| SALK_033062-RP  | ACACTTCTCTGCAGCTTCAGC  |
| SAIL_33-C06-LP  | TTTCCATACAAGTGGTCCCTG  |
| SAIL_33-C06-RP  | GATCTCTGATTCTGGCACTGC  |
| SAIL_448_D02-LP | TGCTTCATGCTCTCAAAGATC  |
| SAIL_448_D02-RP | CTCTGCTCCTGTTGCGTAAAC  |
| SALK_139579-LP  | TCAATGGACGTAACCTTTGAGG |
| SALK_139579-RP  | AGTGAAACGGTTGACGTTGAC  |
| SALK_206468-LP  | AACGCCACTAAAAGGAAAAGG  |
| SALK_206468-RP  | TCACCACTTGGCATTAGATCC  |
| SAIL_809_D01-LP | CGAGAGAGAGACCGACATTTG  |
| SAIL_809_D01-RP | CAACAGCTCACGGATAAGTCC  |
| SALK_007108_LP  | GGCGAAAATGTTAACACCAC   |
| SALK_007108_RP  | CTTTTCAGGAGGGACAAAACC  |
| fer-4_LP        | AGATCACAGAGGGACGATTC   |
| fer-4_RP        | GCACCAAACACACAAAACCC   |
| GAB1(R)         | GTGGATTGATGTGATATCTCC  |

|                       |                                    |
|-----------------------|------------------------------------|
| SAIL_103_E02_LP       | TTGTATGGGTTGCAGGAAAAG              |
| SAIL_103_E02_RP       | TTCCTCCTCTCTGGTTTCTCC              |
| SAIL_1234_C03-LP      | TTGATGATGCTATGGAGCTCC              |
| SAIL_1234_C03-RP      | CAAATCTTCTTTGCAGGCTG               |
| SALK_118763.3-LP      | CAAGCAAAGTCCTTGAAGGC               |
| SALK_118763.3-RP      | ACGGTTCATGTCTCCGAATC               |
| SAIL_47_G04-LP        | TCCGAGTGAGGAACAAACATC              |
| SAIL_47_G04-RP        | TGCCAAGAACTCACATTTTCC              |
| SALK_040289_LP        | GTCATTGGCAGAAGAGCAAAC              |
| SALK_040289_RP        | TGACGTAACGTCGGAAGTAGG              |
| CS66103-LP            | CGCACACATGCACCTAAGTAG              |
| CS66103-RP            | TCCGACGTTACGTCATAATCC              |
| SALK_150039-LP        | CGCCGGACTAGTCTTATCTCC              |
| SALK_150039-RP        | TACATTTTTGCAGCCACTTTG              |
| AT2g23200-genotypingF | CTCTTTAGCTCTCATCAATGCCA            |
| AT2g23200-genotypingR | TGTTCCCTCGCTGAATCTTTTC             |
| mpk4-LP               | TTGCTCTGAATACACAGCAGC              |
| mpk4-RP               | GTCTTAGAGATCAGCGGGGAC              |
| mkk1-LP               | ACGACCATTTCGTCTTCGTC               |
| mkk1-RP               | GGACATTGCGAGCTCAAGTT               |
| FISH1-LP              | CTGGGAATGGCGAAATCAAGGCATC          |
| SAIL_511_H01-LP       | TTCTTTTCCCAAATGGATTCC              |
| SAIL_511_H01-RP       | GTTAAAGCCATCCCTGACTCC              |
| LBb1.3                | ATTTTGCCGATTTCCGGAAC               |
| LB1                   | GCCTTTTCAGAAATGGATAAATAGCCTTGCTTCC |

### Cloning primers

| Name                             | Sequence                                     |
|----------------------------------|----------------------------------------------|
| NcoI(ATG)-BglII-(ATG)At5g38900-F | CATGCCATGGAGATCTATGATCTGTACGTTTTAGTA<br>ATTT |
| SnaBI-SmaI-At5g38900-R           | CATTACGTACCCGGGCCGTGCTTTAGGTTTCATTGA         |
| LET2-Km-F                        | CACTTGTTGCGGTTGAACGGCTGGAAATTA               |
| LET2-Km-R                        | TAATTTCCAGCCGTTCAACCGCAACAAGTG               |
| BamHI-At2g23200-F                | CGGGATCCATGGAGAATTTCTGTTTTCAAGAC             |
| StuI-At2g23200-R                 | GAAGGCCTTCTTGCATCAGAGATCTTCAACT              |
| At2g23200-no BamHI-F             | CGGTTACTTGGACCCAGAATATCTCC                   |
| At2g23200-no BamHI-R             | GGAGATATTCTGGGTCCAAGTAACCG                   |
| LET1-K516E-F                     | ACCAAAGCCGCTATCGAACGAGGCAAAC                 |
| LET1-K516E-R                     | GGTTTTGCCTCGTTCGATAGCGGCTTTGGT               |
| BamHI-MPK4-F                     | GCCGGATCCATGTCGGCGGAGAGTTGTTT C              |
| StuI-MPK4-R                      | GAAGGCCTCACTGAGTCTTGAGGATTGAAC               |
| BamHI-MEKK2-F                    | CGGGATCCATGAAGAAGTCGTCGGATAA                 |
| StuI-MEKK2-R                     | GAAGGCCTTCTACGGATTAGCGGAGATG                 |
| BamHI-SUMM2-F                    | CGGGATCCATGGGAGCTTGTTTAACACTCTCG             |
| StuI-SUMM2-R                     | GAAGGCCTCCGCACATAACTTAACCTTGCCATTC           |
| SUMM2D478V-F                     | GTTAAAATGCATGTTGTGG TCCGG                    |

|                   |                                                       |
|-------------------|-------------------------------------------------------|
| SUMM2D478V-R      | CCGAACCACAACATGCATTTTAAC                              |
| BamHI-LET1-ECD-F  | GGAGGATCCATGGAGAATTTCTGTTTTCAAG                       |
| BamHI-LET1-exJM-F | GGAGGATCCATGGAGCAGCCTAGGTTGGCG                        |
| StuI-LET1-ECD-R   | GGCAGGCCTAACCCGGGAACTGCTTCTAT                         |
| BglII-LLG1-F      | TACAGATCTTTCATTTTCAGATGGGGTCTTC                       |
| PstI-LLG1-R       | CAGCTGCAGTCAGAACAACCTTAACAAAAAC                       |
| BamHI-LET2ex-F    | AGAGAACAGATTGGTGGATCCATGTCGTATGAGCCC<br>ACTGATGT      |
| HindIII-LET2ex-R  | CTCGAGTGCGGCCGCAAGCTTTCATCTTGCATCAGA<br>GATCTTCAACTGC |
| BamHI-LET2CD-F    | AGAGAACAGATTGGTGGATCCATGAAGAGAAAGAAG<br>AAGAGCAACG    |
| HindIII-LET2CD-R  | CTCGAGTGCGGCCGCAAGCTTTCACCGTGCTTTAGG<br>TTCATTGATCT   |

#### qRT-PCR primers

| Name        | Sequence                 |
|-------------|--------------------------|
| UBQ10-qRT-F | AGATCCAGGACAAGGAAGGTATTC |
| UBQ10-qRT-R | CGCAGGACCAAGTGAAGAGTAG   |
| PR1-F       | GGTTAGCGAGAAGGCTAACTAC   |
| PR1-R       | CATCCGAGTCTCACTGACTTTC   |
| PR2-F       | GCATTCGCTGGATGTTTTG      |
| PR2-R       | CTTCAACCACACCAGCTTGGAC   |
